# Supplementary material
Source: publisher figshare collection journal article supplement (https://karger.figshare.com/ndownloader/files/12280586)
Supplement: Supplementary file 1 [file 12280586]

# Supplement Table S1

## Literature Search Report (*for review only*)

Literature search did not reveal previous reports of *S. epidermidis* isolation from human hair follicles that emits UVRF.

**Basic searching filters** (filters may be adjusted according to grammar of different databases):

**For English databases:** ("*S. epidermidis*" OR "*Staphylococcus epidermidis*") AND "red fluorescence"

**For Chinese databases:** "表皮葡萄球菌" AND "红色荧光" (表皮葡萄球菌= *S. epidermidis*; 红色荧光= red fluorescence)

Basic search conditions: unlimited

Time of publication: unlimited

Results:

| Database name          | URL                                                                                     | Fields                   | Number of hits | Remarks                                                                                                                                                                             |
|------------------------|-----------------------------------------------------------------------------------------|--------------------------|----------------|-------------------------------------------------------------------------------------------------------------------------------------------------------------------------------------|
| Pubmed                 | <a href="https://www.ncbi.nlm.nih.gov/pubmed/">https://www.ncbi.nlm.nih.gov/pubmed/</a> | Full text (quick search) | 2              | None related to our discovery                                                                                                                                                       |
| SCIE                   | <a href="http://www.webofknowledge.com">http://www.webofknowledge.com</a>               | Topic                    | 4              | Three articles are not related to our discovery. One article reports <i>S. epidermidis</i> UVRF after incubation but not <i>S. epidermidis</i> autofluorescence, like in our study. |
| ELSEVIER ScienceDirect | <a href="http://www.sciencedirect.com">http://www.sciencedirect.com</a>                 | Topic                    | 2              | One article is not related to our discovery. One article reports <i>S. epidermidis</i> UVRF after incubation with 5-aminolevulinic acid.                                            |

|                                |                                                                                       |                  |     |                                                                                                                                             |
|--------------------------------|---------------------------------------------------------------------------------------|------------------|-----|---------------------------------------------------------------------------------------------------------------------------------------------|
| Wiley online library           | <a href="http://onlinelibrary.wiley.com/">http://onlinelibrary.wiley.com/</a>         | Title, abstract  | 0   |                                                                                                                                             |
| The Oxford Journals Collection | <a href="http://services.oxfordjournals.org/">http://services.oxfordjournals.org/</a> | Full text*       | 21  | None related to our discovery                                                                                                               |
| Google Scholar                 | <a href="https://scholar.google.com/">https://scholar.google.com/</a>                 | Full text        | 648 | None related to our discovery                                                                                                               |
| Ovid                           | <a href="http://www.ovid.com/">http://www.ovid.com/</a>                               | Full text*       | 2   | None related to our discovery                                                                                                               |
| Sinomed                        | <a href="http://www.sinomed.ac.cn/">http://www.sinomed.ac.cn/</a>                     | Full text*       | 2   | One article is not related to our discovery. One article reports <i>S. epidermidis</i> UVRF after incubation with 5-aminolevulinic acid.    |
| Wangfang Data                  | <a href="http://wanfangdata.com.cn">http://wanfangdata.com.cn</a>                     | Full text*       | 3   | One article is not related to our discovery. Two articles report <i>S. epidermidis</i> UVRF after incubation with 5-aminolevulinic acid.    |
| Vip                            | <a href="http://www.cqvip.com">http://www.cqvip.com</a>                               | Title & keywords | 0   |                                                                                                                                             |
| CNKI                           | <a href="http://www.cnki.net">http://www.cnki.net</a>                                 | Topic            | 6   | Four articles are not related to our discovery. Two articles report <i>S. epidermidis</i> UVRF after incubation with 5-aminolevulinic acid. |

\*Full text search when option of “topic” was not available.
